# Supplementary material for: Fabrication and characterization of Cu–ZnO–cellulose acetate electrospun nanocomposite membranes for dual-function photocatalytic degradation and microbial inhibition
Source: Royal Society of Chemistry journal article supplement (doi:10.1039/d5ma00890e), 2025-01-01
Supplement: d5ma00890e1.pdf [file d5ma00890e1.pdf]

## Fabrication and characterization of Cu–ZnO–cellulose acetate electrospun nanocomposite membranes for dual-function photocatalytic degradation and microbial inhibition

### Supplementary Data

Figure S1: Tauc plots for 450°C Samples a) ZnO b) 3% Cu-ZnO c) 5% Cu-ZnO d) 7% Cu-ZnO e) 10% Cu-ZnO

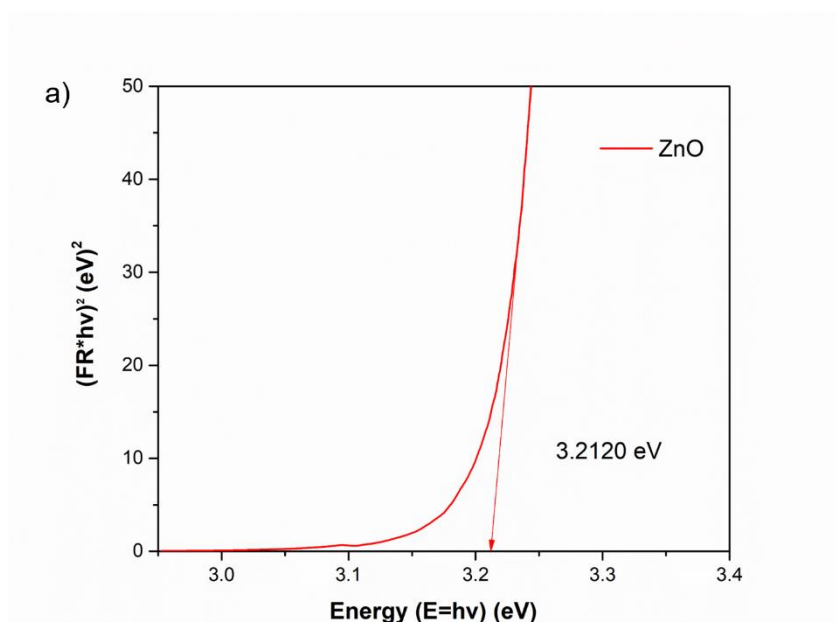

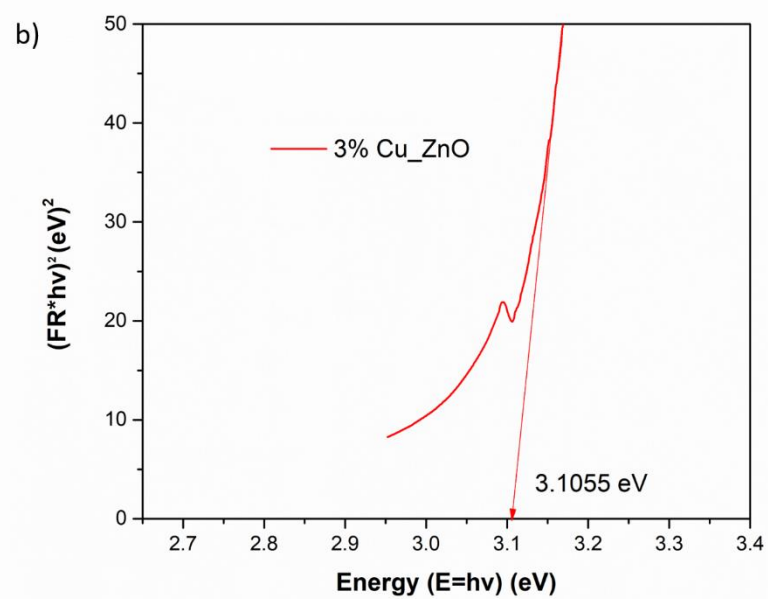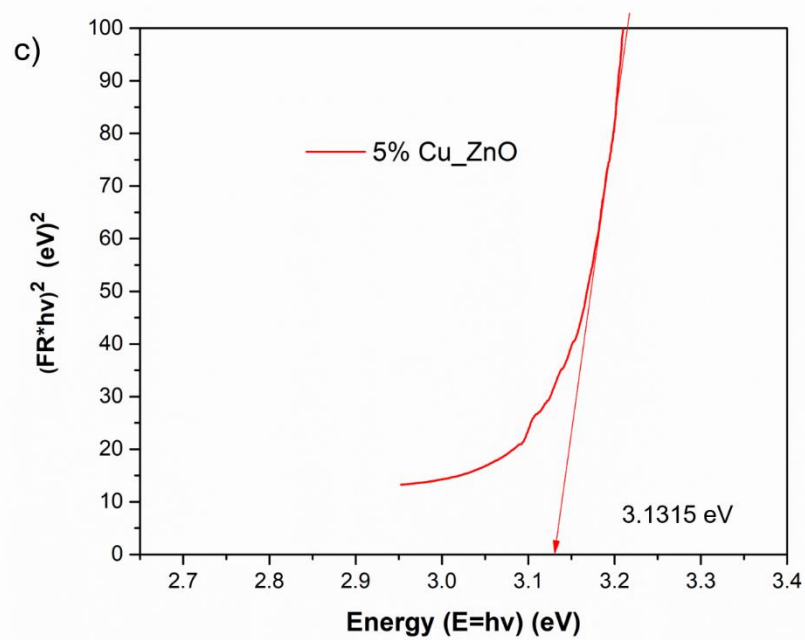

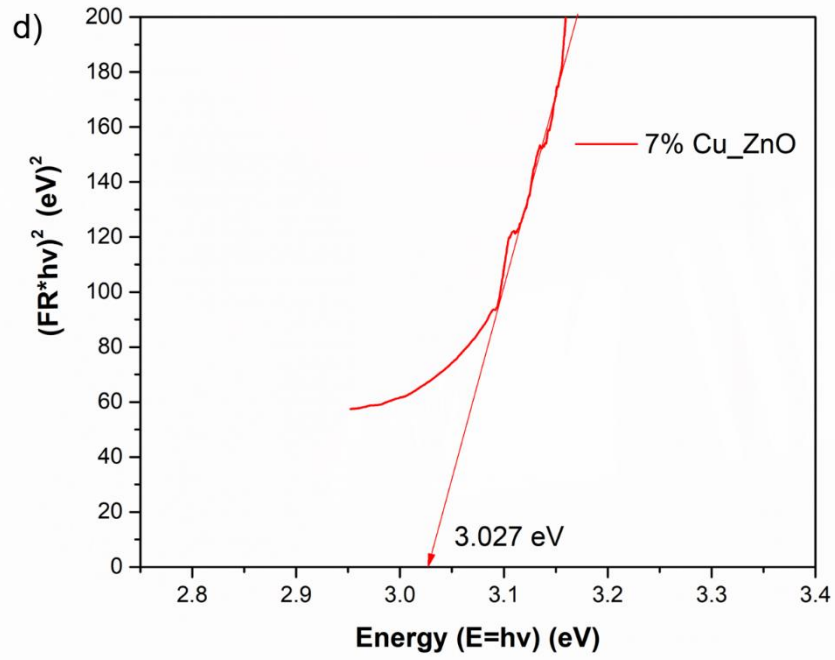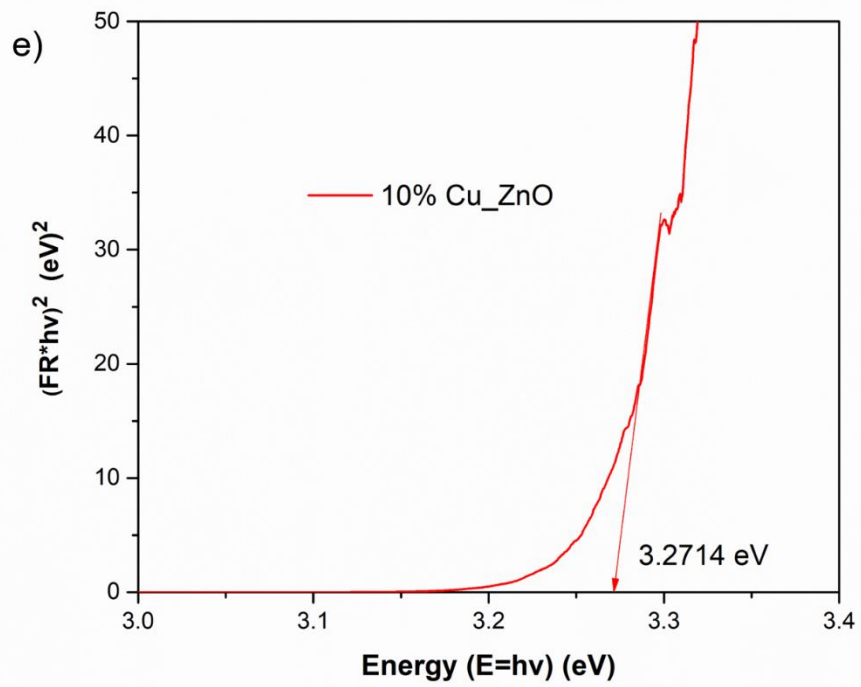

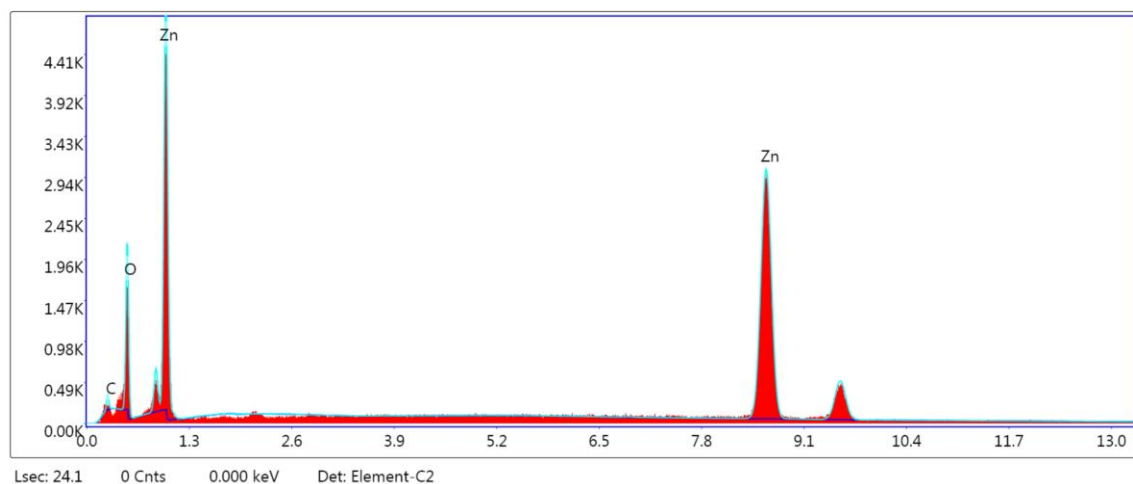

**Figure S1: EDX for ZnO nanoparticles calcined at 450 °C**

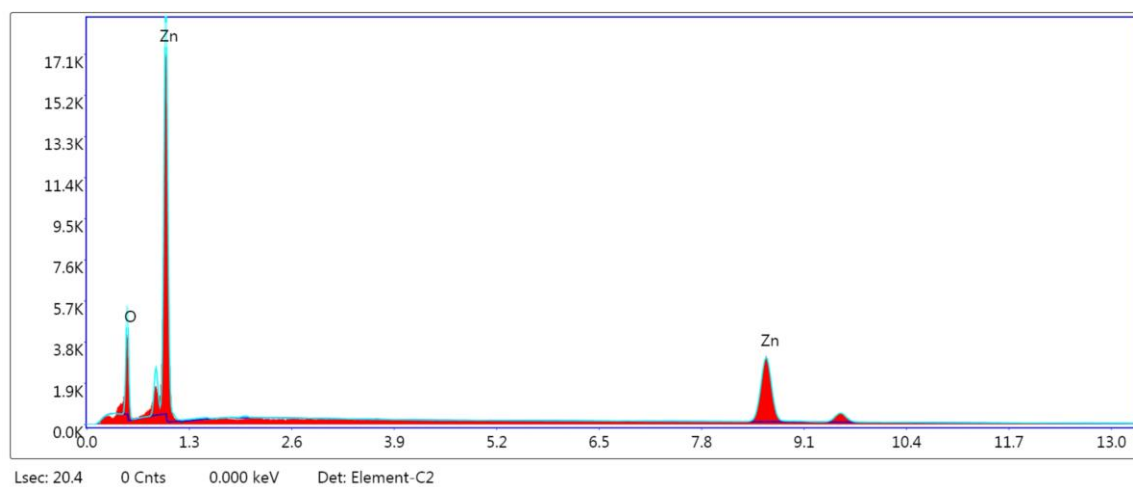

**Figure S2: EDX for ZnO nanoparticles calcined at 650 °C**

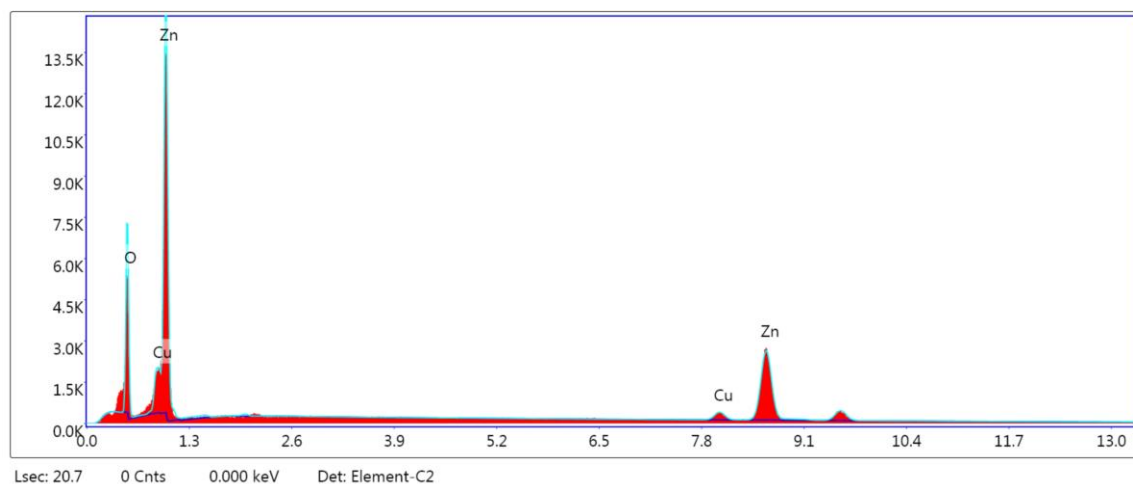

**Figure S3: EDX for 7% Cu-ZnO nanoparticles calcined at 450 °C**

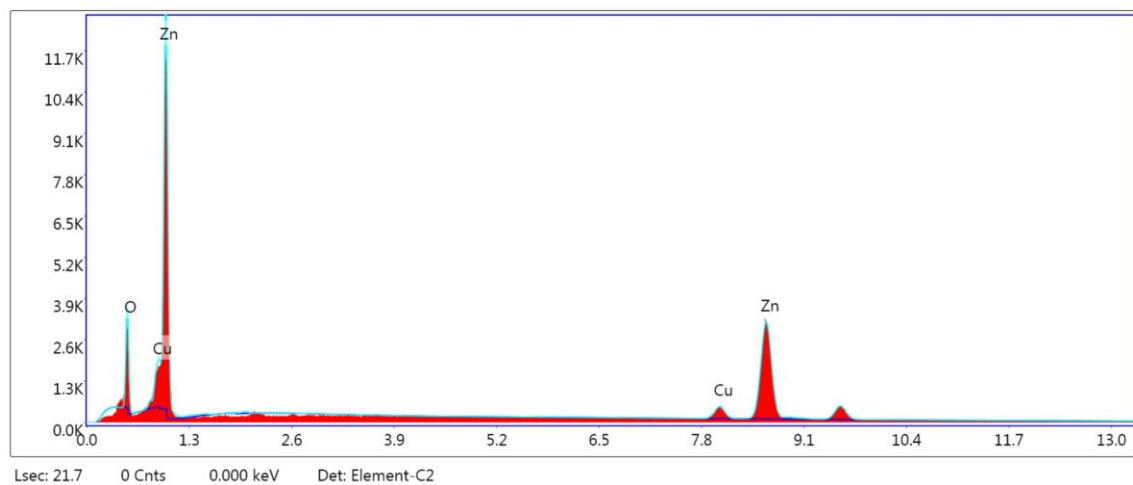

**Figure S4: EDX for 7% Cu-ZnO nanoparticles calcined at 650 °C**

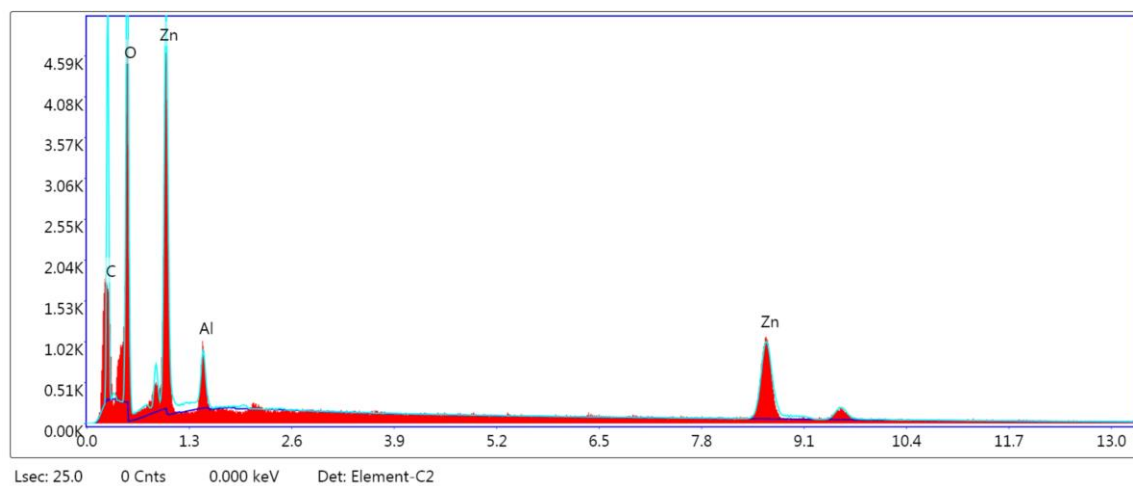

**Figure S5 EDX for ZnO CA membrane**

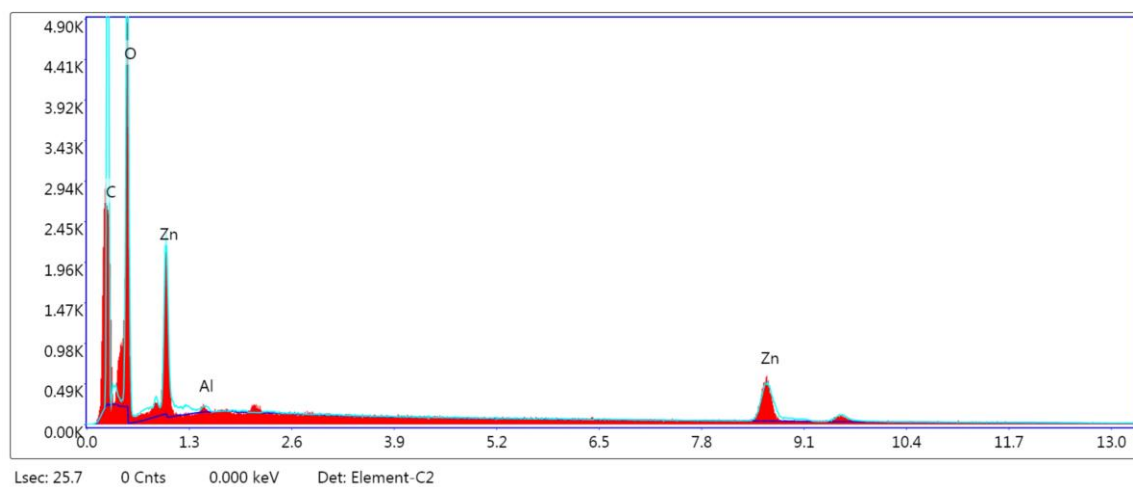

**Figure S6 EDX for 7% Cu-ZnO CA membrane**

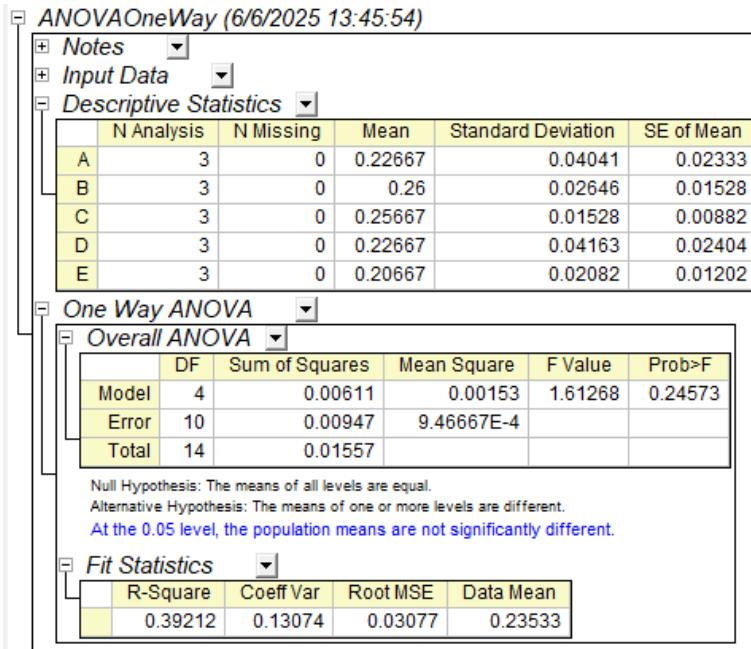

Figure S8: ANOVA results for Zn in ZnO mat

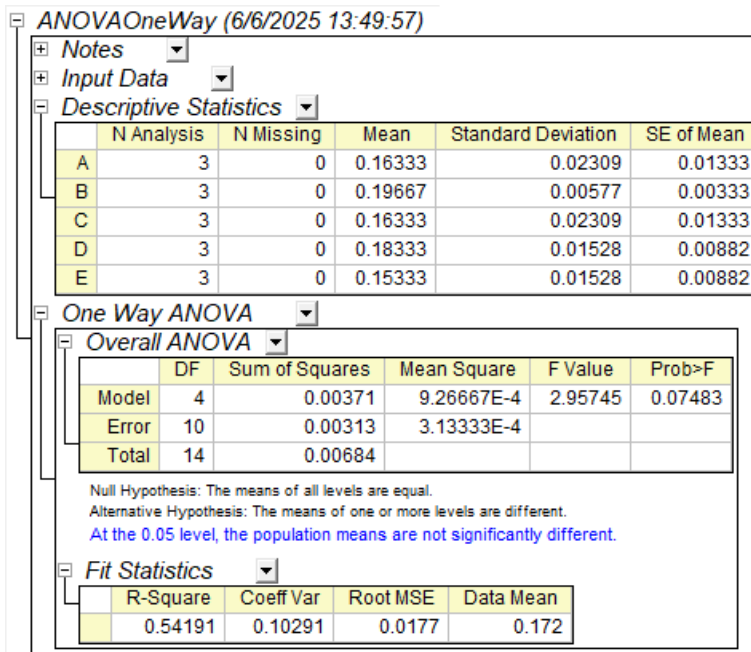

Figure S9: ANOVA results for Zn in 7% Cu\_ZnO mat

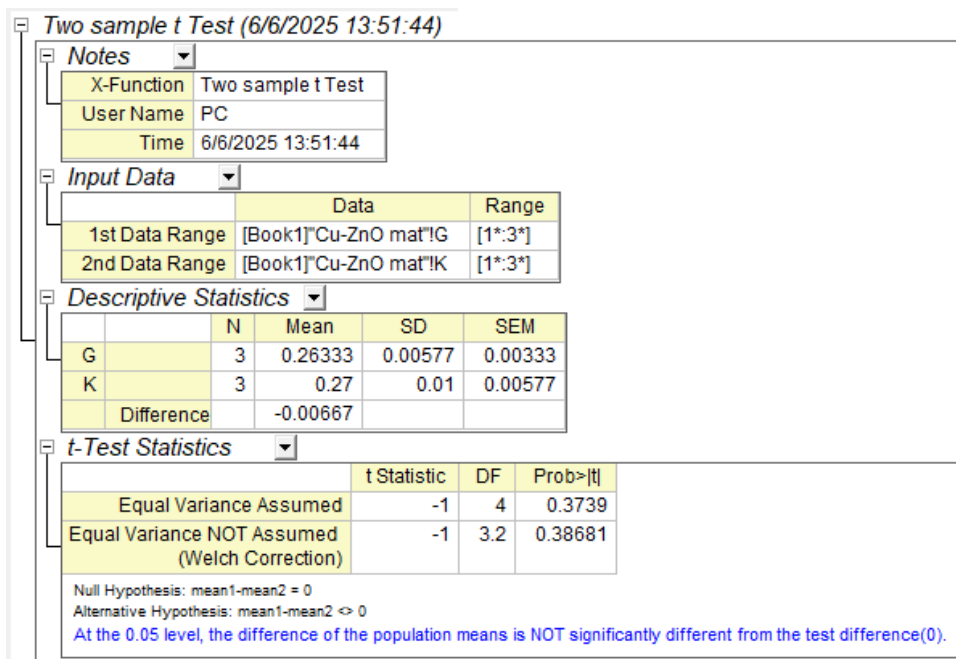

Figure S10: 2 sample T results for Cu in 7% Cu\_ZnO mat



Figure S11

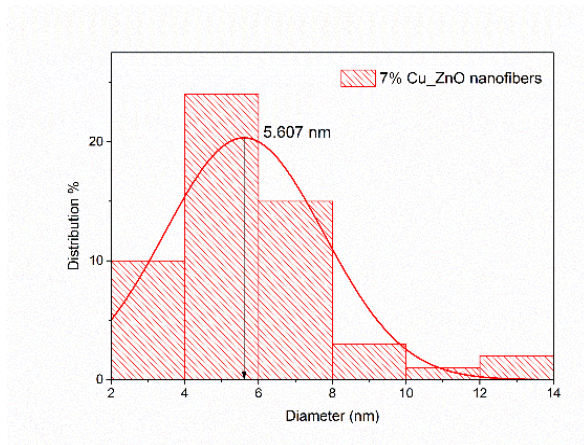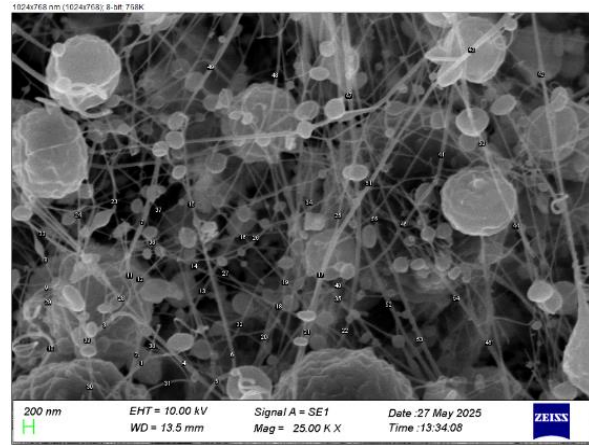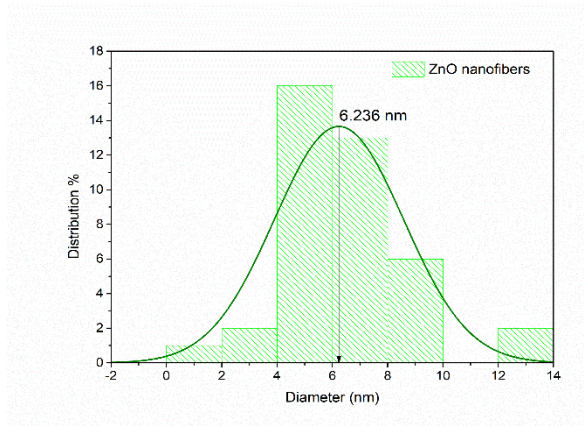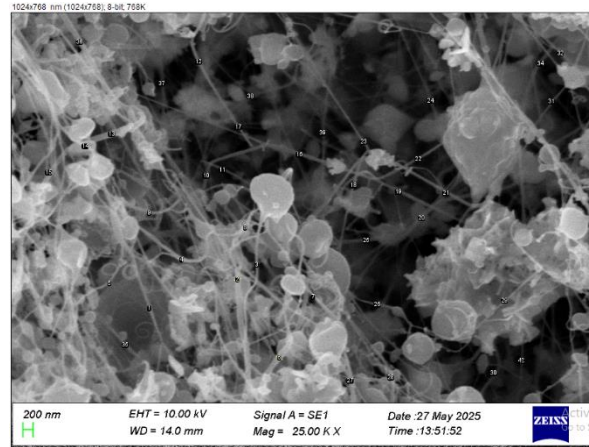

Figure S12

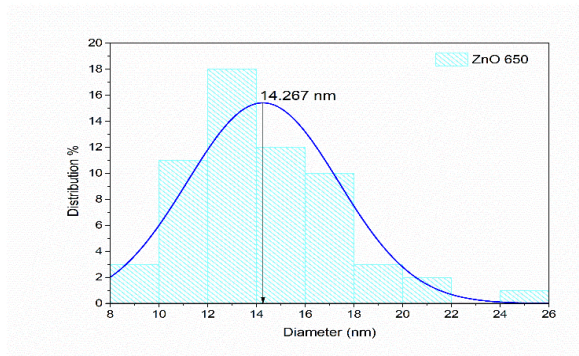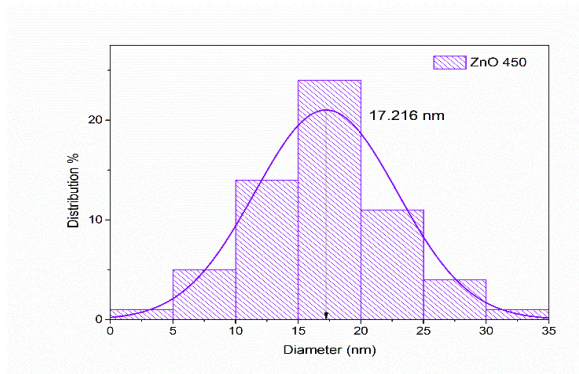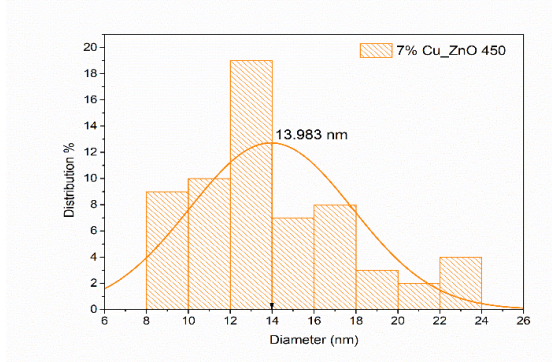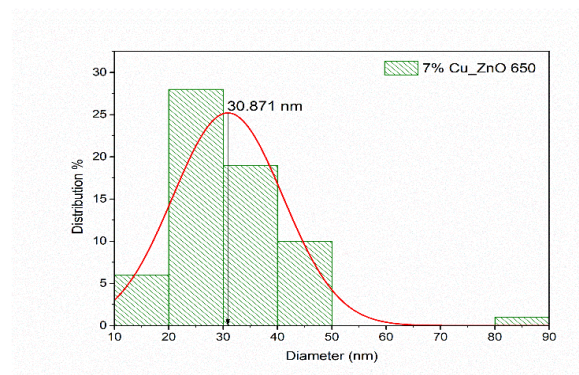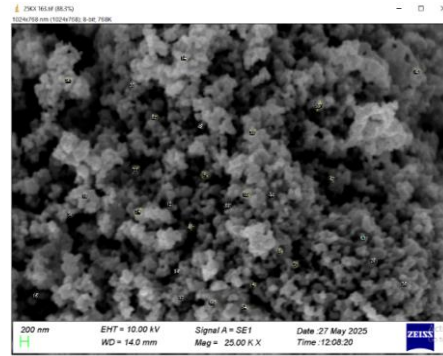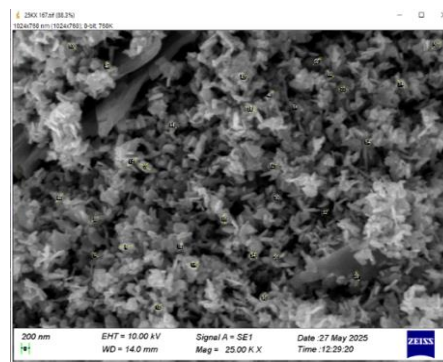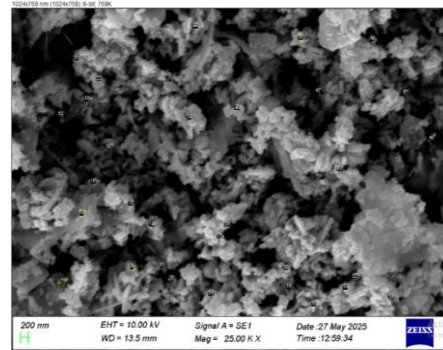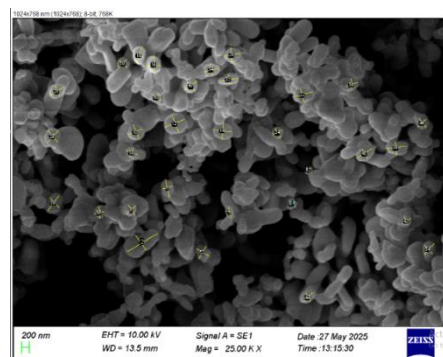



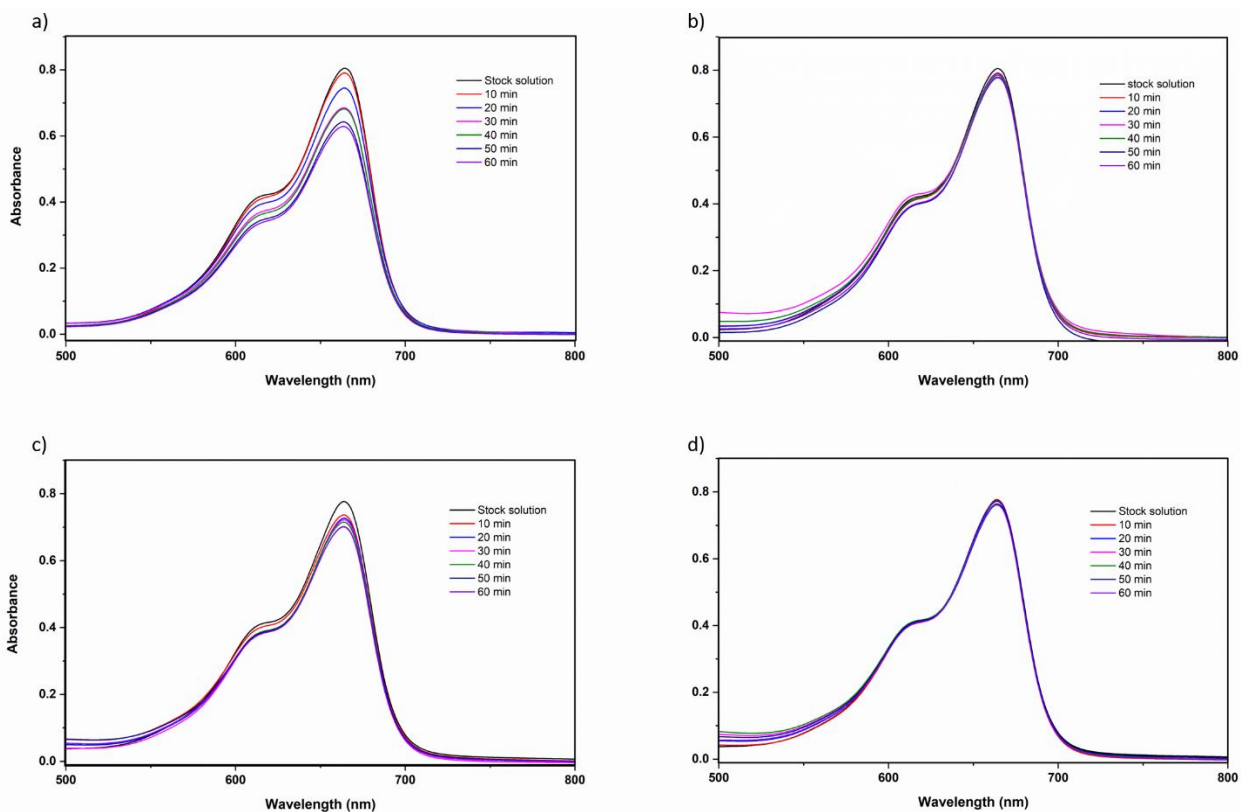

**Figure S13:** UV-Vis absorbance spectra for the degradation of MB dye; (a) ZnO (450°C) under visible light, (b) ZnO (450°C) under dark, (c) ZnO (650°C) under visible light, (d) ZnO (650°C) under dark.

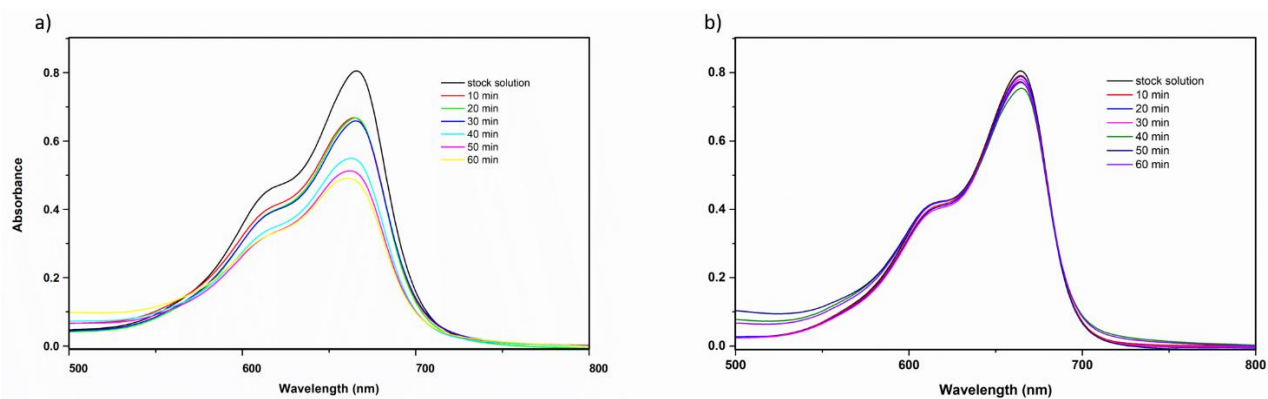

**Figure S14:** UV-Vis absorbance spectra for the degradation of MB dye; (a) 7% Cu-ZnO (450°C) under visible light, (b) 7% Cu-ZnO (450°C) under dark.

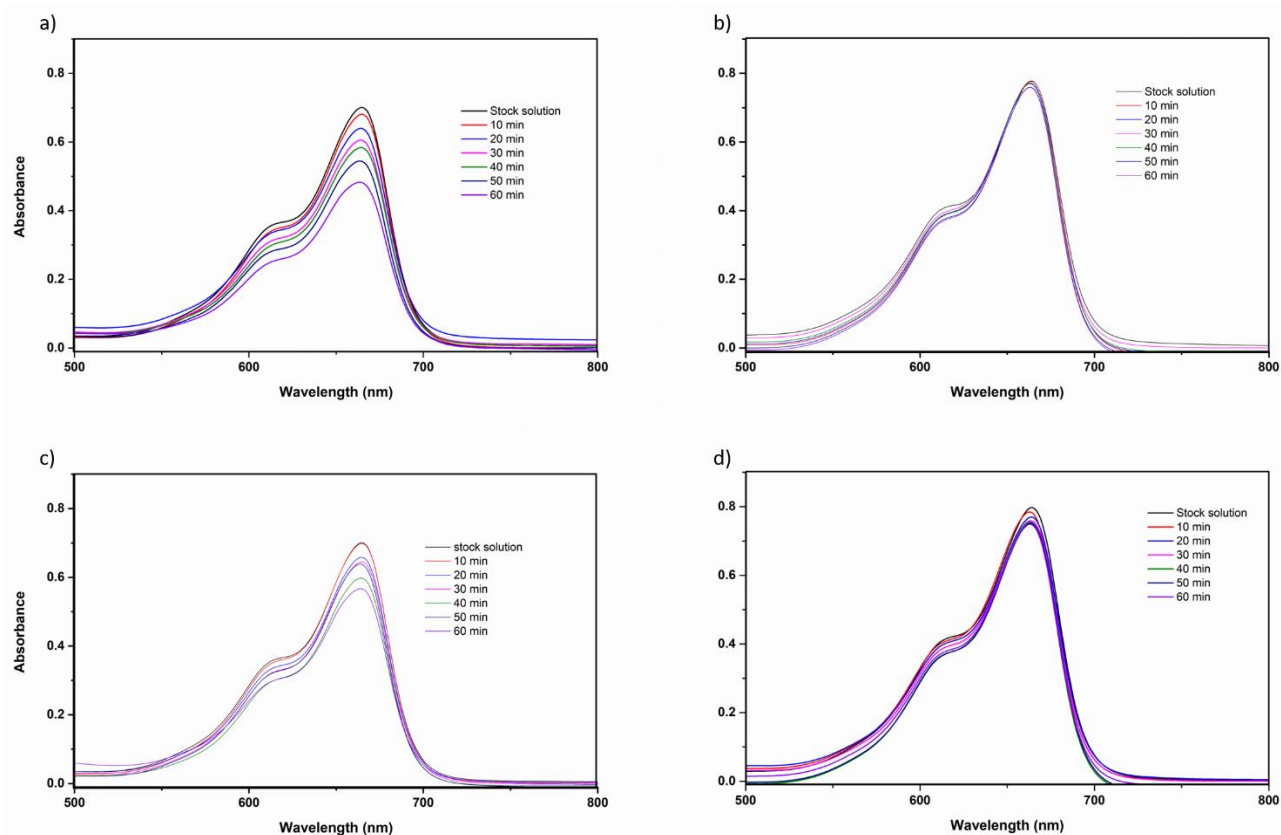

**Figure S15:** UV-Vis absorbance spectra for the degradation of MB dye; (a) 7% Cu-ZnO mat under visible light, (b) 7% Cu-ZnO mat under dark, (c) ZnO mat under visible light, (d) ZnO mat under dark.
